# Supplementary material
Source: publisher figshare collection journal article supplement (https://acs.figshare.com/ndownloader/files/13461692)
Supplement: Supplementary file 1 [file 13461692]

**Cell Selective Pore Forming Antimicrobial Peptides of the Prodomain of Human Furin:  
A Conserved Aromatic/Cationic Sequence Mapping, Membrane Disruption and  
Atomic-resolution Structure and Dynamics**

**Sheetal Sinha<sup>†,⊥</sup>, Munesh Kumar Harioudh<sup>§</sup>, Rikeshwer P. Dewangan<sup>§</sup>, Wun Jern Ng<sup>¶</sup>,**

**Jimut Kanti Ghosh<sup>§</sup> and Surajit Bhattacharjya<sup>†\*</sup>**

**<sup>†</sup>School of Biological Sciences, Nanyang Technological University, 60 Nanyang Drive,  
Singapore 637551**

**<sup>⊥</sup>Advanced Environmental Biotechnology Centre, Nanyang Environment and Water  
Research Institute, Nanyang Technological University, 1 Cleantech Loop, Singapore  
637141 and Interdisciplinary Graduate School, Nanyang Technological University, 50  
Nanyang Avenue, Singapore 639798**

**<sup>¶</sup>Environmental Bio-Innovation Group (EBiG), School of Civil and Environmental  
Engineering, Nanyang Technological University, 50 Nanyang Avenue, Singapore 639798**

**<sup>§</sup>Molecular and Structural Biology Division, CSIR-Central Drug Research Institute,  
Sector 10, Jankipuram Extension, Sitapur Road, Lucknow–226 031, India**

**\*Address correspondence to: Surajit Bhattacharjya, 60 Nanyang Drive, Singapore, 637551,  
e-mail: [surajit@ntu.edu.sg](mailto:surajit@ntu.edu.sg), Fax: 65-6791-3856**

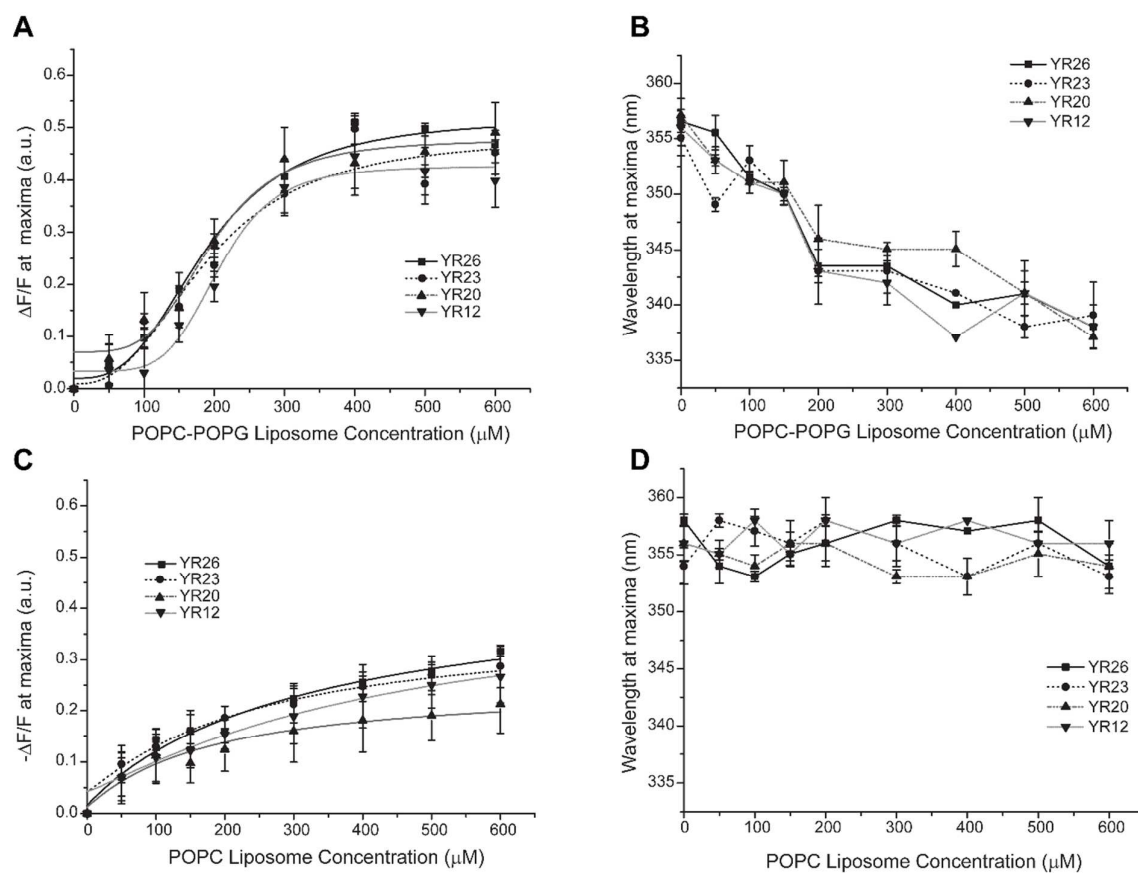

**Supplementary Figure S1:** Intrinsic Trp fluorescence experiments of YR26, YR23, YR20 and YR12 peptides as a function of concentrations of liposomes. (A) Changes in fluorescence intensity at the emission maxima and (B) Changes in emission wavelength ( $\lambda_{\text{max}}$ ) induced by negatively charged POPC-POPG liposomes. (C) Changes in fluorescence intensity at the emission maxima and (B) Changes in emission wavelength ( $\lambda_{\text{max}}$ ) induced by zwitterionic POPC liposomes.

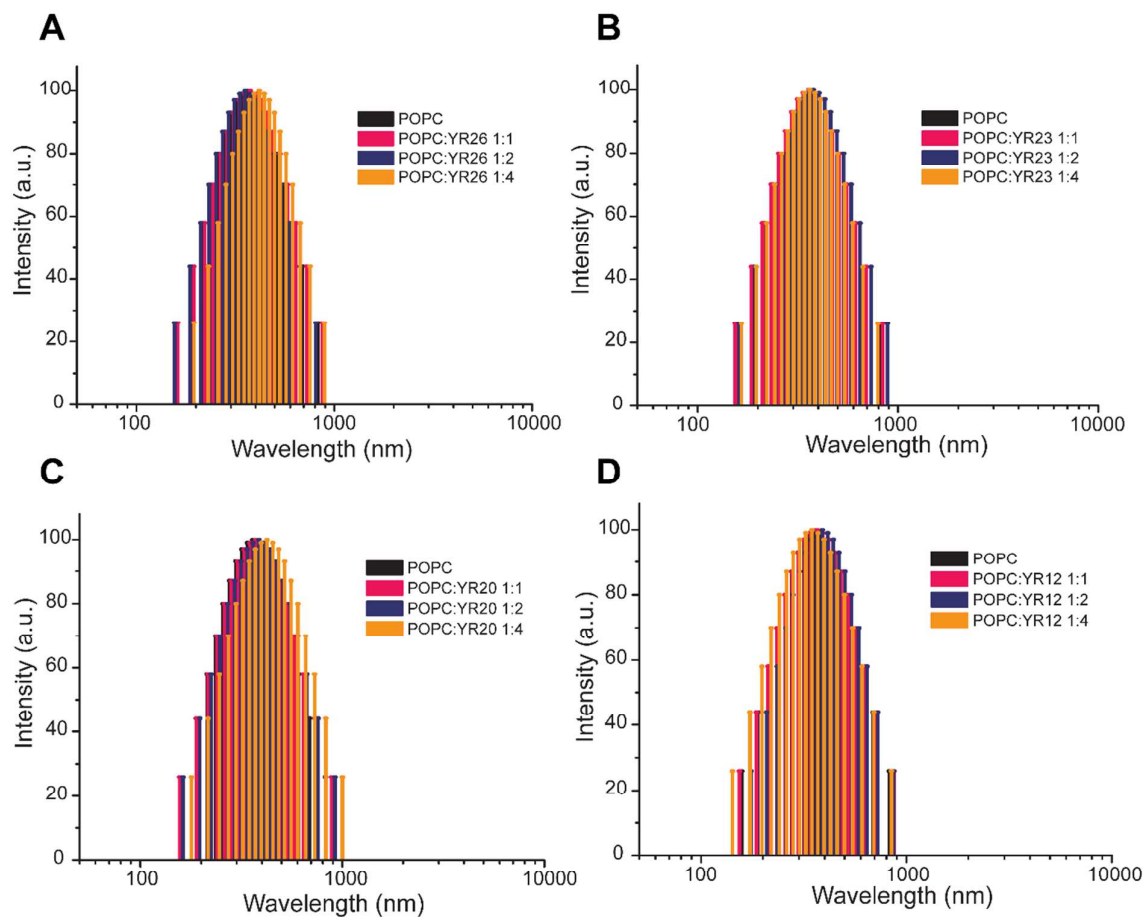

**Supplementary Figure S2:** Bar diagrams show particle size distribution of POPC vesicles, estimated from DLS experiments, in free solutions and at different molar ratios of peptides (A) YR26, (B) YR23, (C) YR20 and (D) YR12.

**Supplementary Table S1:** Particle size analysis (nm) of zwitterionic POPC liposomes. There is no significant change in the mean diameter of zwitterionic POPC liposomes even in presence of high peptide concentrations. This suggests that the tested peptides are highly selective and do not interact with these mammalian cell mimicking liposomes. The mean diameter of free POPC liposome was observed to be 370.8 nm.

| Peptides | POPC: Peptide |       |       |
|----------|---------------|-------|-------|
|          | 1:1           | 1:2   | 1:4   |
| YR26     | 379.2         | 351.3 | 406   |
| YR23     | 362.5         | 374.3 | 352.4 |
| YR20     | 375.8         | 382.9 | 412   |
| YR12     | 368.9         | 385.7 | 337.1 |

**Supplementary Table S2:** Particle size analysis (nm) of POPC-POPG liposomes. Particle size distribution of POPC-POPG liposomes in presence of increasing concentrations of prodomain peptides. The mean diameter of free POPC-POPG liposome was observed to be 192.3 nm.

| Peptides | POPC-POPG: Peptide |        |        |
|----------|--------------------|--------|--------|
|          | 1:1                | 1:2    | 1:4    |
| YR26     | 488.1              | 1193.5 | 2311.2 |
| YR23     | 521.5              | 938.4  | 1515.9 |
| YR20     | 420.2              | 658.6  | 1063.9 |
| YR12     | 198.2              | 227.4  | 430.8  |

**Supplementary Table S3:** A summary of structural statistics of YR26 in presence of anionic SDS micelles.

|                                                                 | <b>YR26 in<br/>presence of<br/>SDS</b> |
|-----------------------------------------------------------------|----------------------------------------|
| <b>Distance constraints</b>                                     |                                        |
| Sequential [ $ i-j =1$ ]                                        | 87                                     |
| Medium range [ $1 <  i-j  < 4$ ]                                | 19                                     |
| Long range [ $ i-j  \geq 4$ ]                                   | 1                                      |
| Total                                                           | 191                                    |
| <b>Dihedral-angle constraints</b>                               | 40                                     |
| <b>Deviation from mean structure (Å)</b>                        |                                        |
| All backbone atoms                                              | 0.27                                   |
| All heavy atoms                                                 | 1.20                                   |
| <b>Ramachandran plot for the mean<br/>structure (%residues)</b> |                                        |
| Most favoured region                                            | 76.2                                   |
| Additional allowed region                                       | 23.8                                   |
| Generously allowed region                                       | 0                                      |
| Disallowed region                                               | 0                                      |
